# Supplementary material for: Enhancement of thermal conductivity and ultrasonic properties by incorporating CdS nanoparticles to PVA nanofluids
Source: publisher site journal article supplement (doi:10.1515/zna-2020-0334), 2021-05-05
Supplement: Supplementary file 1 [file j_zna-2020-0334_suppl.docx]

**Date: 12/04/2021**

**To,**

**Editor-in-Chief**

"Zeitschrift für Naturforschung A - A Journal of Physical Sciences" (ZNA)

**Subject:** *Submission of Research Paper*

**Dear Sir,**

We are submitting our manuscript entitled **“Enhancement of thermal conductivity and ultrasonic properties by incorporating CdS nanoparticles to PVA nanofluids”** online for to be publishing in your reputed Journal. The reply to reviewer’s comment is attached and the corresponding changes made in the manuscript are highlighted with yellow colour in the revised manuscript. This paper has not yet been published or is under consideration elsewhere. We believe that the findings of this study are relevant to the scope of your journal and will be of interest to its readers.

I look forward to hearing from you at your earliest convenience. We shall highly appreciate for your kind help and guidance.

Thanking you,

With best regards,

Yours Sincerely


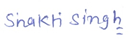


**(Shakti Pratap Singh)**

Corresponding Author
